# Supplementary material for: Variation in the Content of Bioactive Compounds in Infusions Prepared from Different Parts of Wild Polish Stinging Nettle (Urtica dioica L.)
Source: MDPI journal article supplement (doi:10.3390/molecules27134242), 2022-06-30
Supplement: s1 [file s1]

# Variation in the Content of Bioactive Compounds in Infusions Prepared from Different Parts of Wild Polish Stinging Nettle (*Urtica Dioica* L.)

Magdalena Jeszka-Skowron <sup>1,\*</sup>, Agnieszka Zgoła-Grzeskowiak <sup>1</sup>, Robert Frankowski <sup>1</sup>,  
Tomasz Grzeskowiak <sup>1</sup> and Anna Maria Jeszka <sup>2</sup>

<sup>1</sup> Institute of Chemistry and Technical Electrochemistry, Poznan University of Technology, Berdychowo 4,  
60-965 Poznań, Poland; agnieszka.zgola-grzeskowiak@put.poznan.pl (A.Z.-G.); robert.frankowski@put.poznan.pl (R.F.); civ@tlen.pl (T.G.)

<sup>2</sup> Institute of Socio-Economics, Poznan University of Economics and Business, Al. Niepodległości 10,  
61-875 Poznań, Poland; anna.jeszka@ue.poznan.pl

\* Correspondence: magdalena.jeszka-skowron@put.poznan.pl; Tel.: +48-665-3347

**Table S1.** ANOVA for Response Surface Linear Model for fresh nettle leaves for the DPPH method.

| Source        | Sum of Squares       | df             | Mean Square    | F Value    | p-Value Prob > F |                 |
|---------------|----------------------|----------------|----------------|------------|------------------|-----------------|
| Model         | 3.67                 | 1              | 3.67           | 30.44      | 0.0002           | significant     |
| B-Temperature | 3.67                 | 1              | 3.67           | 30.44      | 0.0002           |                 |
| Residual      | 1.33                 | 11             | 0.12           |            |                  | not significant |
| Lack of Fit   | 1.04                 | 7              | 0.15           | 2.04       | 0.2557           |                 |
| Pure Error    | 0.29                 | 4              | 0.072          |            |                  |                 |
| Cor Total     | 4.99                 | 12             |                |            |                  |                 |
| Std. Dev.     | 0.35                 | R-Squared      | 0.7346         |            |                  |                 |
| Mean          | 1.90                 | Adj R-Squared  | 0.7104         |            |                  |                 |
| C.V. %        | 18.30                | Pred R-Squared | 0.6210         |            |                  |                 |
| PRESS         | 1.89                 | Adeq Precision | 13.957         |            |                  |                 |
| Factor        | Coefficient Estimate | df             | Standard Error | 95% CI Low | 95% CI High      | VIF             |
| Intercept     | 1.88                 | 1              | 0.096          | 1.66       | 2.09             | 1.00            |
| B-Temperature | 0.67                 | 1              | 0.12           | 0.40       | 0.94             |                 |

**Table S2.** ANOVA for Response Surface Linear Model for fresh nettle leaves for the Folin-Ciocalteu method.

| Source        | Sum of Squares       | df             | Mean Square    | F Value    | <i>p</i> -Value<br>Prob > F |                 |
|---------------|----------------------|----------------|----------------|------------|-----------------------------|-----------------|
| Model         | 2.33                 | 1              | 2.33           | 180.59     | < 0.0001                    | significant     |
| B-Temperature | 2.33                 | 1              | 2.33           | 180.59     | < 0.0001                    |                 |
| Residual      | 0.14                 | 11             | 0.013          |            |                             | not significant |
| Lack of Fit   | 0.13                 | 7              | 0.019          | 5.91       | 0.0527                      |                 |
| Pure Error    | 0.013                | 4              | 3.135E-003     |            |                             |                 |
| Cor Total     | 2.48                 | 12             |                |            |                             |                 |
| Std. Dev.     | 0.11                 | R-Squared      | 0.9426         |            |                             |                 |
| Mean          | 1.74                 | Adj R-Squared  | 0.9374         |            |                             |                 |
| C.V. %        | 6.52                 | Pred R-Squared | 0.9252         |            |                             |                 |
| PRESS         | 0.19                 | Adeq Precision | 33.995         |            |                             |                 |
| Factor        | Coefficient Estimate | df             | Standard Error | 95% CI Low | 95% CI High                 | VIF             |
| Intercept     | 1.73                 | 1              | 0.032          | 1.66       | 1.80                        |                 |
| B-Temperature | 0.54                 | 1              | 0.040          | 0.45       | 0.62                        | 1.00            |

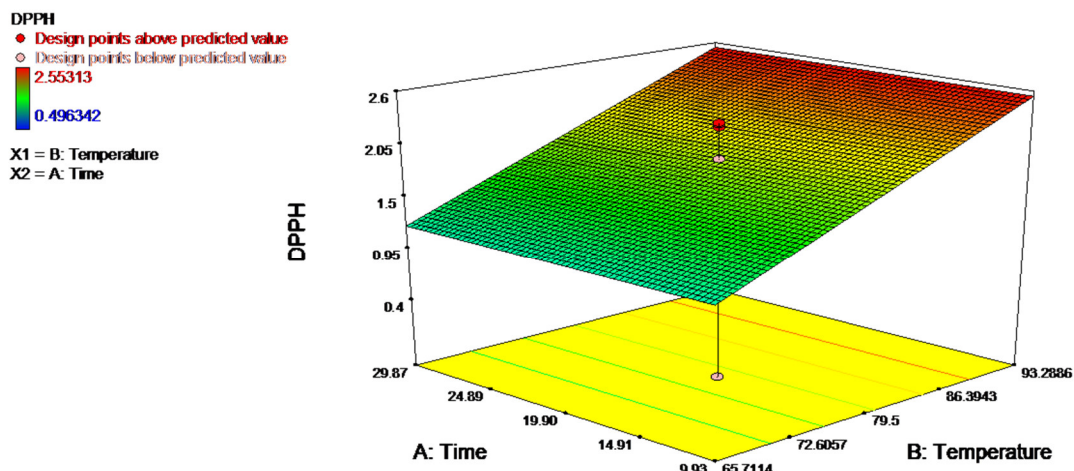

Figure S1. Model graph for fresh nettle obtained for the DPPH method.

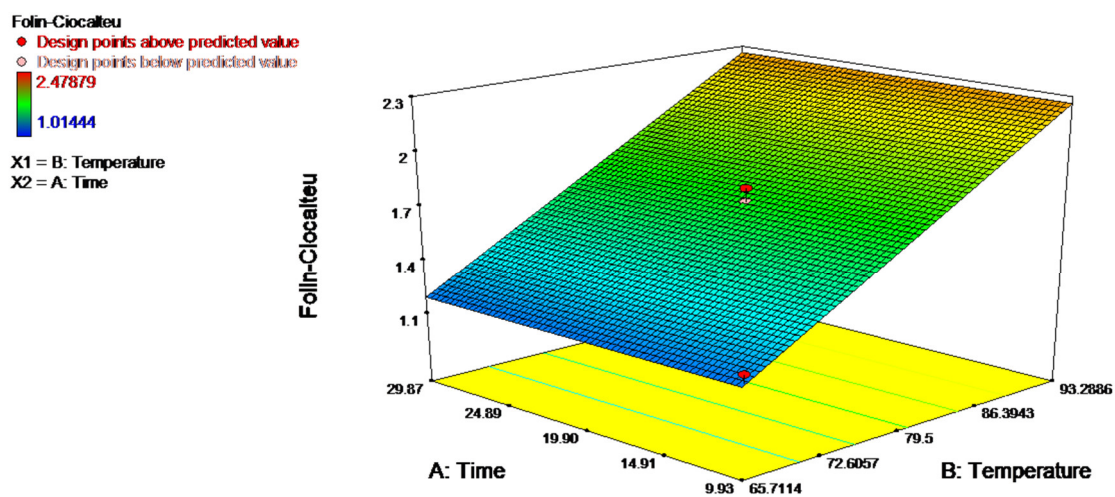

Figure S2. Model graph for fresh nettle obtained for the Folin-Ciocalteu method.

**Table S3.** Structures of compounds determined using capillary isotachopheresis (oxalic, citric and succinic acid) and LC-MS/MS (other compounds).

|                                                                                     |                                                                                      |                                                                                       |
|-------------------------------------------------------------------------------------|--------------------------------------------------------------------------------------|---------------------------------------------------------------------------------------|
| Oxalic acid                                                                         | Citric acid                                                                          | Succinic acid                                                                         |
| 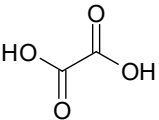   |     |    |
| Malic acid                                                                          | Salicylic acid                                                                       | Syringic acid                                                                         |
|    |     |    |
| Quinic acid                                                                         | Protocatechuic acid                                                                  | <i>p</i> -coumaric acid                                                               |
|    |     |    |
| Quercetin                                                                           | Ferulic acid                                                                         | Kaempferol                                                                            |
|   |    |   |
| Nicotinamide                                                                        | Nicotinic acid                                                                       | Trigonelline                                                                          |
|  |   |  |
| Rutin                                                                               | 3-caffeoylquinic acid                                                                |                                                                                       |
|  |  |                                                                                       |

**Table S4.** Linearity, limit of detection and limit of quantitation in the ITP method.

| Analyte       | Calibration<br>Curve Range<br>[mg L <sup>-1</sup> ] | Correlation<br>Coefficient<br>(r <sup>2</sup> ) | Limit of<br>Detection<br>[mg L <sup>-1</sup> ] | Limit of<br>Quantitation<br>[mg L <sup>-1</sup> ] |
|---------------|-----------------------------------------------------|-------------------------------------------------|------------------------------------------------|---------------------------------------------------|
| Phosphate (V) | 8–500                                               | 0.9994                                          | 3                                              | 8                                                 |
| Oxalic acid   | 8–500                                               | 0.9964                                          | 3                                              | 8                                                 |
| Citric acid   | 20–500                                              | 0.9999                                          | 7                                              | 20                                                |
| Malic acid    | 20–500                                              | 0.9996                                          | 7                                              | 20                                                |

**Table S5.** LC mobile phase gradient and MS source parameters.

| Mobile phase Gradient (Percentage of<br>Acetonitrile)                            | Parameters of Source                                                                                                                                                      |
|----------------------------------------------------------------------------------|---------------------------------------------------------------------------------------------------------------------------------------------------------------------------|
| Negative ionization                                                              |                                                                                                                                                                           |
| 0 min 5%,<br>2 min 5%,<br>5 min 15%,<br>10 min 20%<br>11 min 70%<br>15.5 min 90% | curtain gas 20 psi<br>nebulizer gas 45 psi<br>auxiliary gas 50 psi<br>temperature 450 °C<br>collision gas medium<br>ion spray voltage -4500 V<br>entrance potential -10 V |
| Positive ionization                                                              |                                                                                                                                                                           |
| 0 min 10%,<br>2 min 10%,<br>2.5 min 100%,<br>4 min 100%                          | curtain gas 20 psi<br>nebulizer gas 45 psi<br>auxiliary gas 45 psi<br>temperature 450 °C<br>collision gas medium<br>ion spray voltage 4500 V<br>entrance potential 10 V   |

**Table S6.** Retention times and mass spectrometer parameters applied for the determination of compounds.

| Compound                       | Retention Time [min] | DP <sup>a</sup> [V] | Analytical Transition | CE <sup>b</sup> [V] | CXP <sup>c</sup> [V] | Confirmatory Transition | CE [V] | CXP [V] |
|--------------------------------|----------------------|---------------------|-----------------------|---------------------|----------------------|-------------------------|--------|---------|
| Negative ionization            |                      |                     |                       |                     |                      |                         |        |         |
| Quinic acid                    | 1.11                 | -55                 | 191 → 85              | -31                 | -5                   | 191 → 93                | -31    | -6      |
| Succinic acid                  | 1.53                 | -31                 | 117 → 73              | -17                 | -4                   | 117 → 99                | -16    | -7      |
| Gallic acid                    | 1.95                 | -45                 | 169 → 125             | -22                 | -7                   | 169 → 95                | -56    | -6      |
| (-)-Gallocatechin              | 3.34                 | -80                 | 305 → 125             | -31                 | -6                   | 305 → 167               | -30    | -2      |
| Protocatechuic acid            | 3.46                 | -45                 | 153 → 109             | -22                 | -5                   | 153 → 91                | -37    | -3      |
| (+)-Catechin                   | 5.95                 | -80                 | 289 → 245             | -23                 | -4                   | 289 → 203               | -29    | -3      |
| Chlorogenic acid               | 6.12                 | -40                 | 353 → 191             | -30                 | -2                   | 353 → 85                | -62    | -5      |
| Caffeic acid                   | 6.47                 | -45                 | 179 → 135             | -25                 | -5                   | 179 → 89                | -47    | -6      |
| Syringic acid                  | 6.79                 | -40                 | 197 → 182             | -20                 | -2                   | 197 → 123               | -34    | -9      |
| (-)-Epicatechin                | 6.97                 | -80                 | 289 → 245             | -23                 | -4                   | 289 → 203               | -29    | -3      |
| (-)-Epigallocatechin 3-gallate | 7.28                 | -80                 | 457 → 169             | -24                 | -2                   | 457 → 305               | -28    | -7      |
| (-)-Gallocatechin 3-gallate    | 7.80                 | -80                 | 457 → 169             | -24                 | -2                   | 457 → 305               | -28    | -7      |
| <i>p</i> -Coumaric acid        | 8.07                 | -35                 | 163 → 119             | -26                 | -5                   | 163 → 93                | -47    | -6      |
| Ferulic acid                   | 8.96                 | -40                 | 193 → 134             | -23                 | -5                   | 193 → 178               | -19    | -6      |
| Sinapic acid                   | 9.15                 | -40                 | 223 → 208             | -20                 | -3                   | 223 → 164               | -22    | -2      |
| (-)-Epicatechin-3-gallate      | 9.42                 | -80                 | 441 → 169             | -29                 | -2                   | 441 → 289               | -27    | -5      |
| Rutin                          | 9.48                 | -80                 | 609 → 300             | -53                 | -6                   | 609 → 271               | -80    | -4      |
| (-)-Catechin 3-gallate         | 9.86                 | -80                 | 441 → 169             | -29                 | -2                   | 441 → 289               | -27    | -5      |
| Salicylic acid                 | 10.92                | -20                 | 137 → 93              | -26                 | -20                  | 137 → 65                | -40    | -4      |
| Quercetin                      | 12.38                | -80                 | 301 → 151             | -31                 | -7                   | 301 → 179               | -26    | -2      |
| Kaempferol                     | 12.53                | -80                 | 285 → 117             | -60                 | -4                   | 285 → 93                | -50    | -6      |
| Positive ionization            |                      |                     |                       |                     |                      |                         |        |         |
| Trigonelline                   | 1.04                 | 50                  | 138 → 94              | 30                  | 4                    | 138 → 92                | 30     | 4       |
| Nicotinamide                   | 1.08                 | 15                  | 123 → 80              | 28                  | 2                    | 123 → 96                | 28     | 4       |
| Nicotinic acid                 | 1.12                 | 30                  | 124 → 80              | 30                  | 3                    | 123 → 78                | 35     | 4       |
|                                |                      |                     |                       |                     |                      | 124 → 96                | 29     | 4       |
|                                |                      |                     |                       |                     |                      | 124 → 78                | 32     | 3       |

<sup>a</sup>DP – declustering potential, <sup>b</sup>CE – collision energy, <sup>c</sup>CXP – cell exit potential.

**Table S7.** Linearity, limit of detection and limit of quantitation in the LC-MS/MS method.

| Analyte                        | Calibration<br>Curve Range<br>[µg L <sup>-1</sup> ] | Correlation<br>Coefficient<br>(r <sup>2</sup> ) | Limit of<br>Detection<br>[µg L <sup>-1</sup> ] | Limit of<br>Quantitation<br>[µg L <sup>-1</sup> ] |
|--------------------------------|-----------------------------------------------------|-------------------------------------------------|------------------------------------------------|---------------------------------------------------|
| Quinic acid                    | 2–4000                                              | 0.9998                                          | 0.76                                           | 2.54                                              |
| Succinic acid                  | 2–1000                                              | 0.9986                                          | 0.85                                           | 2.84                                              |
| Gallic acid                    | 2–1000                                              | 0.9992                                          | 0.40                                           | 1.32                                              |
| (-)-Gallocatechin              | 20–4000                                             | 0.9988                                          | 0.89                                           | 2.96                                              |
| Protocatechuic acid            | 2–1000                                              | 0.9984                                          | 0.12                                           | 0.40                                              |
| (+)-Catechin                   | 2–4000                                              | 0.9985                                          | 0.43                                           | 1.45                                              |
| 3-chlorogenic acid             | 2–1000                                              | 0.9986                                          | 0.23                                           | 0.76                                              |
| Syringic acid                  | 2–4000                                              | 0.9998                                          | 0.15                                           | 0.50                                              |
| (-)-Epicatechin                | 2–1000                                              | 0.9996                                          | 0.24                                           | 0.78                                              |
| (-)-Epigallocatechin 3-gallate | 20–4000                                             | 0.9995                                          | 3.44                                           | 11.47                                             |
| (-)-Gallocatechin 3-gallate    | 10–4000                                             | 0.9999                                          | 2.03                                           | 6.75                                              |
| Ferulic acid                   | 2–4000                                              | 0.9981                                          | 0.11                                           | 0.35                                              |
| Sinapic acid                   | 2–1000                                              | 0.9987                                          | 0.06                                           | 0.19                                              |
| (-)-Epicatechin-3-gallate      | 2–4000                                              | 0.9996                                          | 0.73                                           | 2.45                                              |
| (-)-Catechin 3-gallate         | 2–4000                                              | 0.9993                                          | 0.82                                           | 2.74                                              |
| Salicylic acid                 | 2–4000                                              | 0.9991                                          | 0.46                                           | 1.53                                              |
| Quercetin                      | 2–1000                                              | 0.9975                                          | 0.14                                           | 0.48                                              |
| Caffeic acid                   | 2–100                                               | 0.9996                                          | 0.51                                           | 1.71                                              |
| Rutin                          | 4–2000                                              | 0.9998                                          | 0.12                                           | 0.40                                              |
| Kaempferol                     | 4–400                                               | 0.9995                                          | 0.50                                           | 1.67                                              |
| <i>p</i> -coumaric acid        | 0.5–250                                             | 0.9982                                          | 0.06                                           | 0.21                                              |
| Nicotinamide                   | 0.5–100                                             | 1.000                                           | 0.1                                            | 0.3                                               |
| Nicotinic acid                 | 1–1000                                              | 0.999                                           | 0.4                                            | 1.2                                               |
| Trigonelline                   | 0.5–50                                              | 0.998                                           | 0.04                                           | 0.1                                               |
